# Supplementary material
Source: publisher figshare collection journal article supplement (https://acs.figshare.com/ndownloader/files/13361381)
Supplement: Supplementary file 1 [file 13361381]

Supporting information

# **Scalable Assembly of Crystalline Binary Nanocrystal Superparticles and Their Enhanced Magnetic and Electrochemical Properties**

Yuchi Yang,<sup>†,‡</sup> Biwei Wang,<sup>‡</sup> Xiudi Shen,<sup>†</sup> Luyin Yao,<sup>†</sup> Lei Wang,<sup>†</sup> Xiao Chen,<sup>†</sup>

Songhai Xie,<sup>‡</sup> Tongtao Li,<sup>‡</sup> Jianhua Hu,<sup>†</sup> Dong Yang,<sup>†</sup> and Angang Dong<sup>\*,‡</sup>

<sup>†</sup>State Key Laboratory of Molecular Engineering of Polymers and Department of Macromolecular Science, Fudan University, Shanghai 200433, China.

<sup>‡</sup>*iChem*, Shanghai Key Laboratory of Molecular Catalysis and Innovative Materials, and Department of Chemistry, Fudan University, Shanghai 200433, China.

\*To whom correspondence should be addressed: [agdong@fudan.edu.cn](mailto:agdong@fudan.edu.cn) (A.D.)

## **Table of Contents**

|                                                                                                                                                                                                                                  |            |
|----------------------------------------------------------------------------------------------------------------------------------------------------------------------------------------------------------------------------------|------------|
| <b>Figure S1.</b> TEM images and the corresponding size distribution histograms of 8.0 nm CoFe <sub>2</sub> O <sub>4</sub> NCs and 17.0 nm Fe <sub>3</sub> O <sub>4</sub> NCs.....                                               | S3         |
| <b>Figure S2.</b> The different lattice planes of AB <sub>13</sub> -type CoFe <sub>2</sub> O <sub>4</sub> -Fe <sub>3</sub> O <sub>4</sub> binary superparticles .....                                                            | S4         |
| <b>Figure S3.</b> The defects of AB <sub>13</sub> -type CoFe <sub>2</sub> O <sub>4</sub> -Fe <sub>3</sub> O <sub>4</sub> binary superparticles .....                                                                             | S5         |
| <b>Figure S4.</b> TEM images of 8.5 nm and 17.0 nm Fe <sub>3</sub> O <sub>4</sub> NCs .....                                                                                                                                      | S6         |
| <b>Figure S5.</b> DLS measurements of AB <sub>13</sub> -type Fe <sub>3</sub> O <sub>4</sub> -Fe <sub>3</sub> O <sub>4</sub> BNSL colloids.....                                                                                   | S7         |
| <b>Figure S6.</b> SEM images of single-component superparticles self-assembled from 17.0 nm Fe <sub>3</sub> O <sub>4</sub> NCs.....                                                                                              | S8         |
| <b>Figure S7.</b> TEM images of AlB <sub>2</sub> -type binary superparticles with various sizes.....                                                                                                                             | S9         |
| <b>Figure S8.</b> TEM image and corresponding SAXS pattern of AlB <sub>2</sub> -type binary superparticles and core-shell superparticles.....                                                                                    | S10        |
| <b>Figure S9.</b> TEM images of Pd-Fe <sub>3</sub> O <sub>4</sub> and Au-Fe <sub>3</sub> O <sub>4</sub> binary superparticles .....                                                                                              | S11        |
| <b>Figure S10.</b> TEM image and the corresponding SAXS patterns of AB <sub>13</sub> -type CoFe <sub>2</sub> O <sub>4</sub> -Fe <sub>3</sub> O <sub>4</sub> binary superparticles self-assembled with different surfactants..... | S12        |
| <b>Figure S11.</b> SEM images and SAXS patterns of <i>fcc</i> superparticles.....                                                                                                                                                | S13        |
| <b>Figure S12.</b> TEM images and the corresponding SAXS patterns of various superparticles after ligand carbonization .....                                                                                                     | S14        |
| <b>Figure S13.</b> Representative CV curves of <i>fcc</i> superparticles composed of 17.0 nm Fe <sub>3</sub> O <sub>4</sub> NCs and 8.0 nm CoFe <sub>2</sub> O <sub>4</sub> NCs.....                                             | S15        |
| <b>Figure S14.</b> Cross-sectional illustration depicting the structural evolution during electrochemical lithiation.....                                                                                                        | S16        |
| <b>Table S1.</b> Reaction conditions for monodisperse Fe <sub>3</sub> O <sub>4</sub> NCs with different sizes...                                                                                                                 | S17        |
| <b>Table S2.</b> NC formulation for the growth of various BNSL colloids.....                                                                                                                                                     | S18        |
| <b>Table S3.</b> Fe and Co contents in the electrolyte after cycling .....                                                                                                                                                       | S19        |
| <b>Calculation of the packing fraction of binary superparticles .....</b>                                                                                                                                                        | <b>S20</b> |

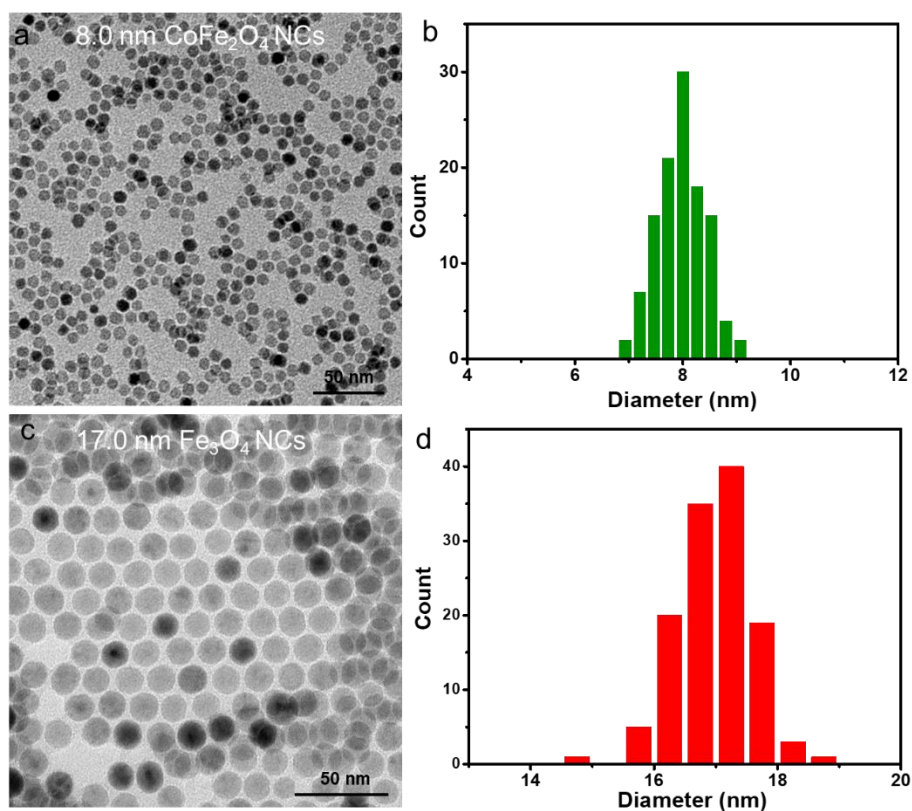

**Figure S1.** TEM images and the corresponding size distribution histograms of (a, b) 8.0 nm  $\text{CoFe}_2\text{O}_4$  NCs and (c, d) 17.0 nm  $\text{Fe}_3\text{O}_4$  NCs used for constructing  $\text{AB}_{13}$ -type binary superparticles.

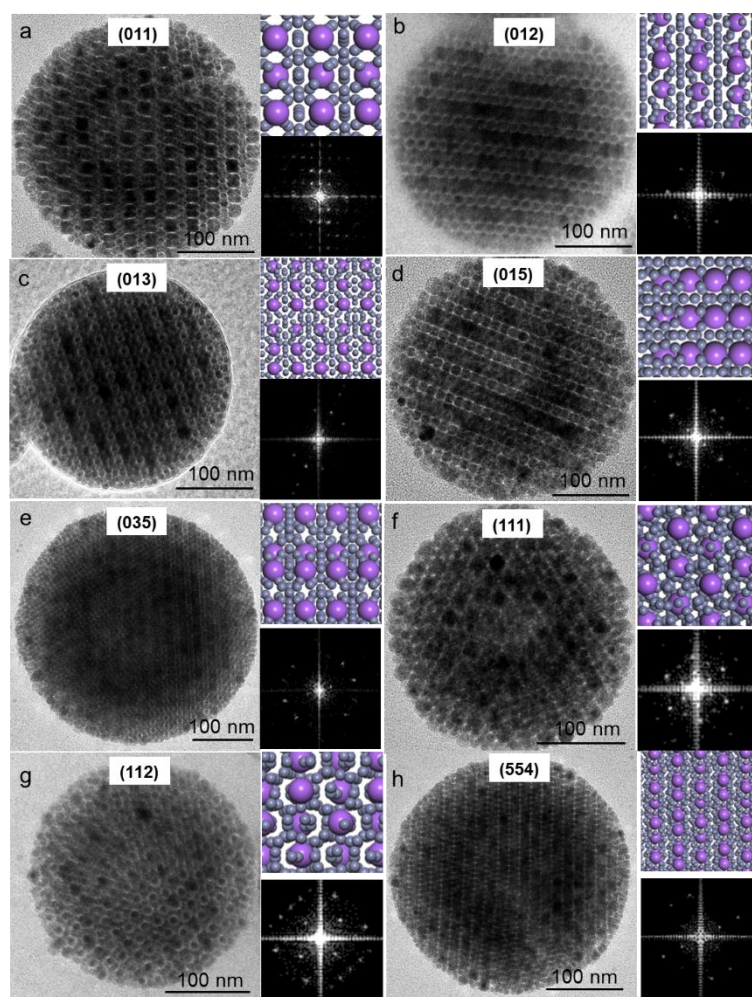

**Figure S2.** (a-h) TEM images and the corresponding crystallographic models and FFTs of AB<sub>13</sub>-type CoFe<sub>2</sub>O<sub>4</sub>-Fe<sub>3</sub>O<sub>4</sub> binary superparticles viewed from various lattice planes as indicated.

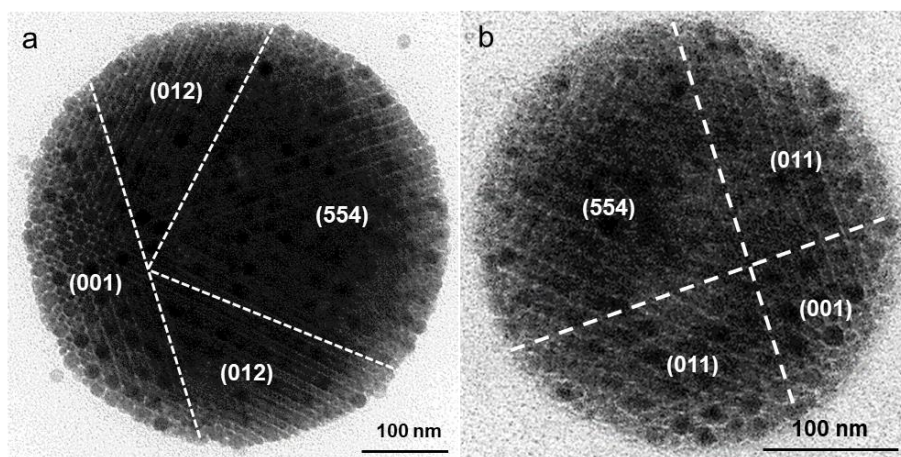

**Figure S3.** (a, b) TEM images of AB<sub>13</sub>-type CoFe<sub>2</sub>O<sub>4</sub>-Fe<sub>3</sub>O<sub>4</sub> binary superparticles with grain boundaries.

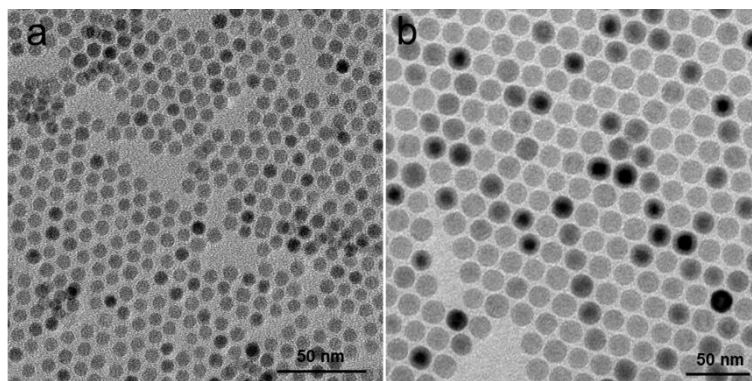

**Figure S4.** TEM images of (a) 8.5 nm and (b) 17.0 nm  $\text{Fe}_3\text{O}_4$  NCs used for constructing  $\text{AB}_{13}$ -type  $\text{Fe}_3\text{O}_4$ - $\text{Fe}_3\text{O}_4$  binary superparticles.

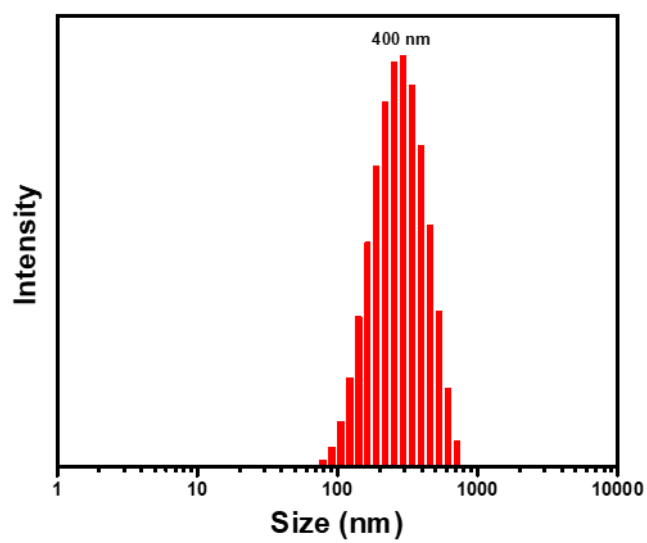

**Figure S5.** DLS measurements of AB<sub>13</sub>-type Fe<sub>3</sub>O<sub>4</sub>-Fe<sub>3</sub>O<sub>4</sub> BNSL colloids.

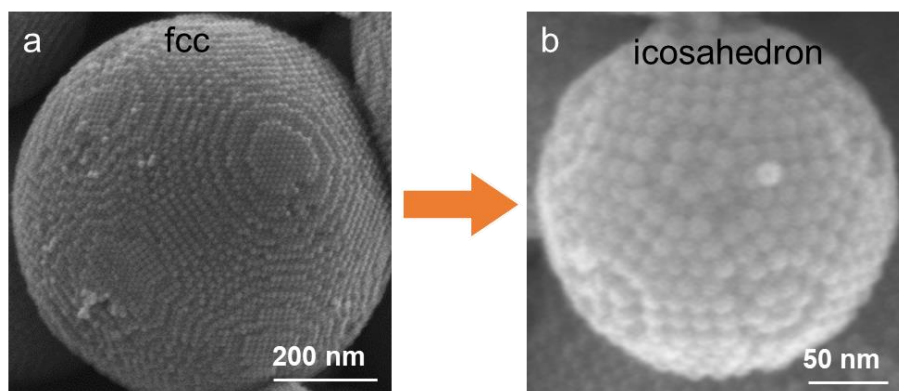

**Figure S6.** SEM images of single-component superparticles self-assembled from 17.0 nm  $\text{Fe}_3\text{O}_4$  NCs, showing the transition from (a) *fcc* to (b) icosahedral symmetry as the superparticle size is reduced to  $\sim 200$  nm.



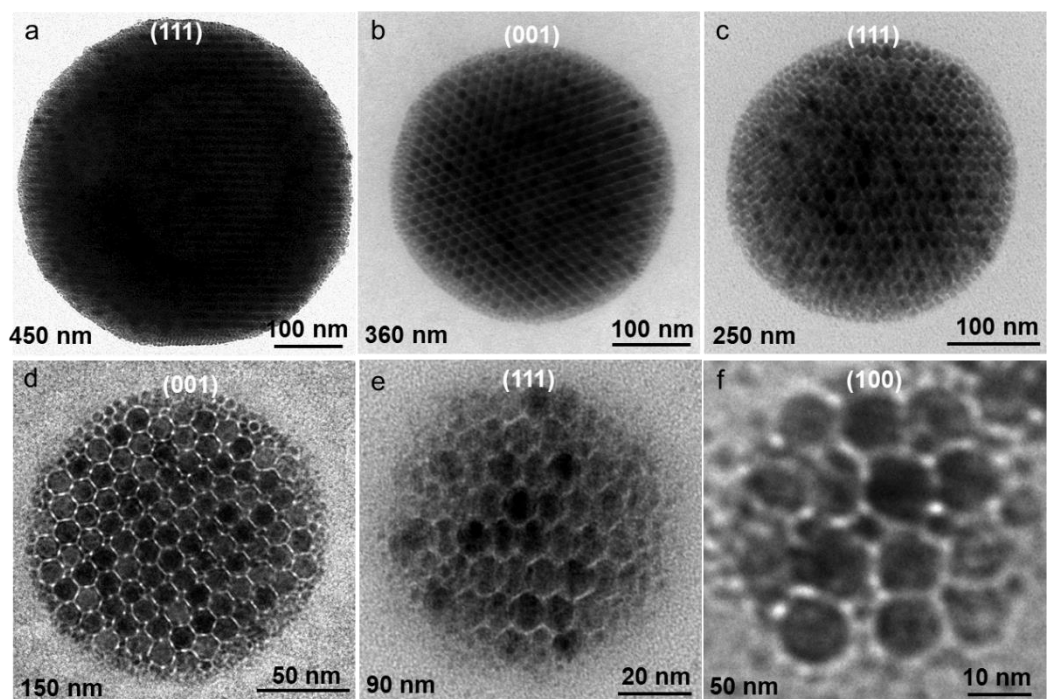

**Figure S7.** TEM images of a series of AlB<sub>2</sub>-type binary superparticles with sizes gradually decreasing from 450 to 50 nm.

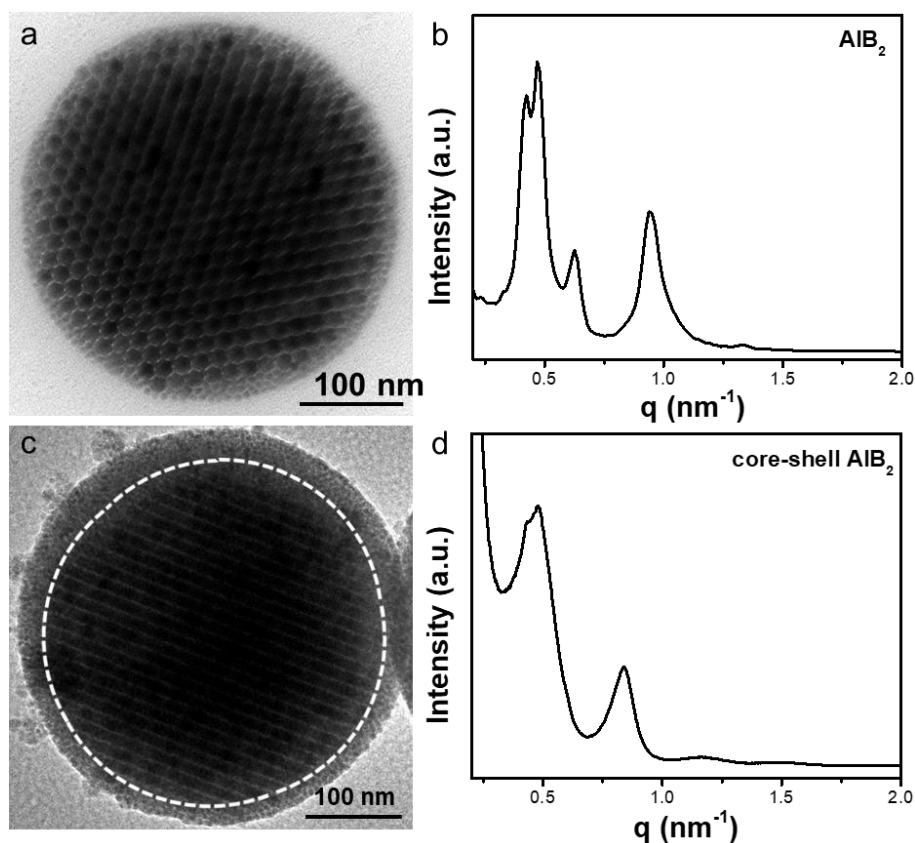

**Figure S8.** (a, b) TEM image and corresponding SAXS pattern of  $\text{AlB}_2$ -type binary superparticles self-assembled from 4.5 nm  $\text{CoFe}_2\text{O}_4$  NCs and 11.0 nm  $\text{Fe}_3\text{O}_4$  NCs with a number ratio of  $\sim 2:1$ . (c, d) TEM image and corresponding SAXS pattern of core-shell superparticles featuring  $\text{AlB}_2$ -type cores (as indicated by the dashed circle), which were self-assembled from 4.5 nm  $\text{CoFe}_2\text{O}_4$  NCs and 11.0 nm  $\text{Fe}_3\text{O}_4$  NCs with a number ratio of  $\sim 13:1$ .

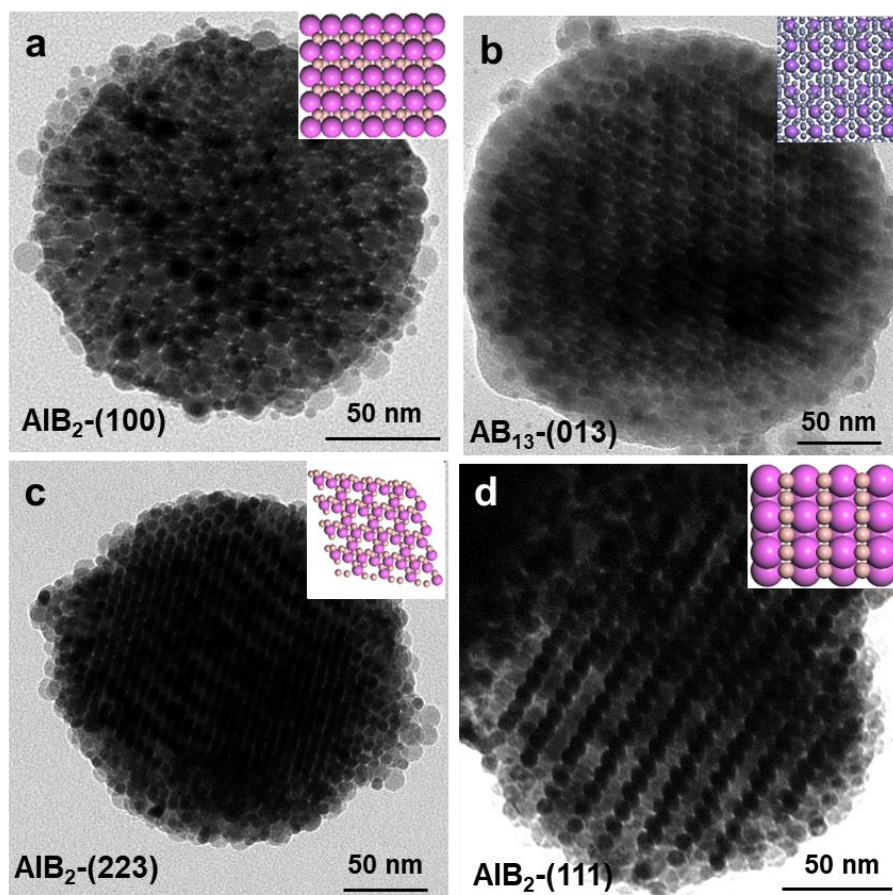

**Figure S9.** TEM images of binary superparticles with various structures and compositions: (a)  $\text{AlB}_2$ -type superparticles composed of 6.0 nm Pd NCs and 15.0 nm  $\text{Fe}_3\text{O}_4$  NCs; (b)  $\text{AB}_{13}$ -type superparticles composed of 8.0 nm Pd NCs and 15.0 nm  $\text{Fe}_3\text{O}_4$  NCs; (c)  $\text{AlB}_2$ -type superparticles composed of 7.0 nm Au NCs and 15.0 nm  $\text{Fe}_3\text{O}_4$  NCs onto the (223) lattice plane; (d)  $\text{AlB}_2$ -type superparticles composed of 7.0 nm Au NCs and 15.0 nm  $\text{Fe}_3\text{O}_4$  NCs onto the (111) lattice plane. Insets show the corresponding crystallographic models.

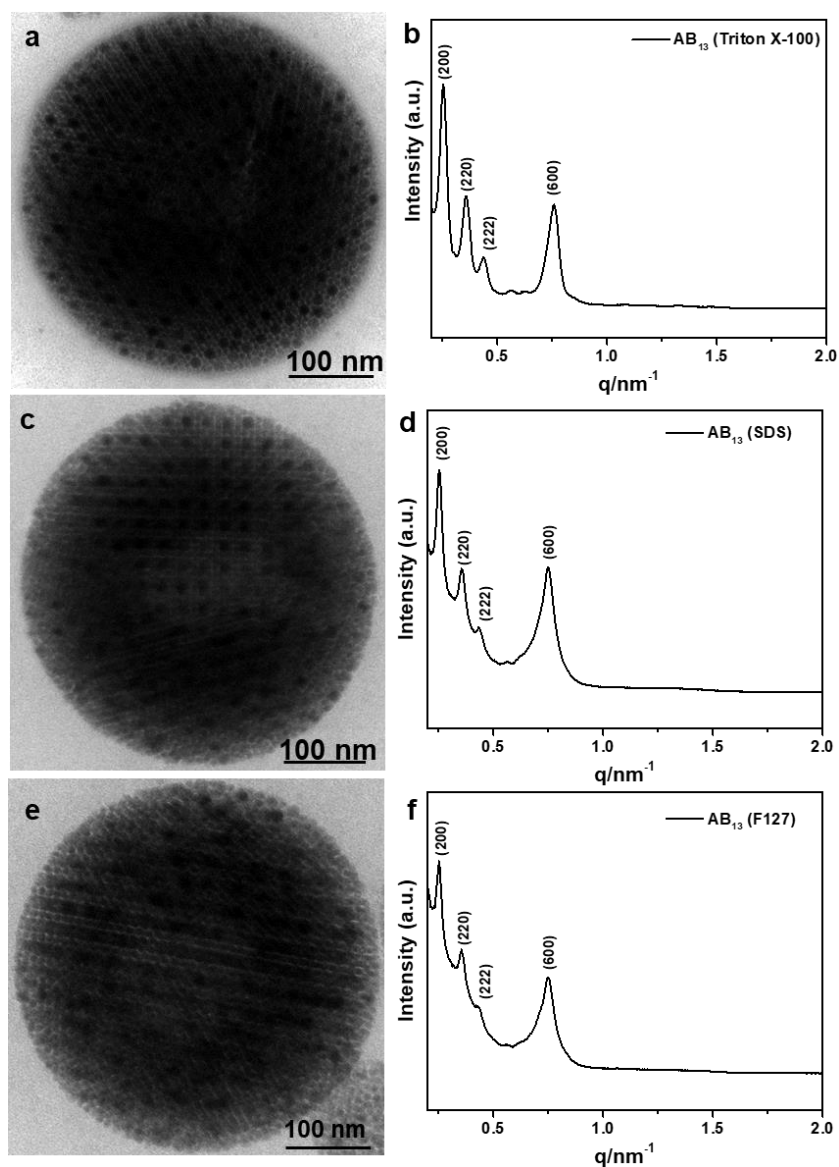

**Figure S10.** TEM image and the corresponding SAXS patterns of  $AB_{13}$ -type  $CoFe_2O_4$ - $Fe_3O_4$  binary superparticles self-assembled with the assistance of different surfactants: (a, b) Triton X-100, (c, d) SDS, and (e, f) F127.

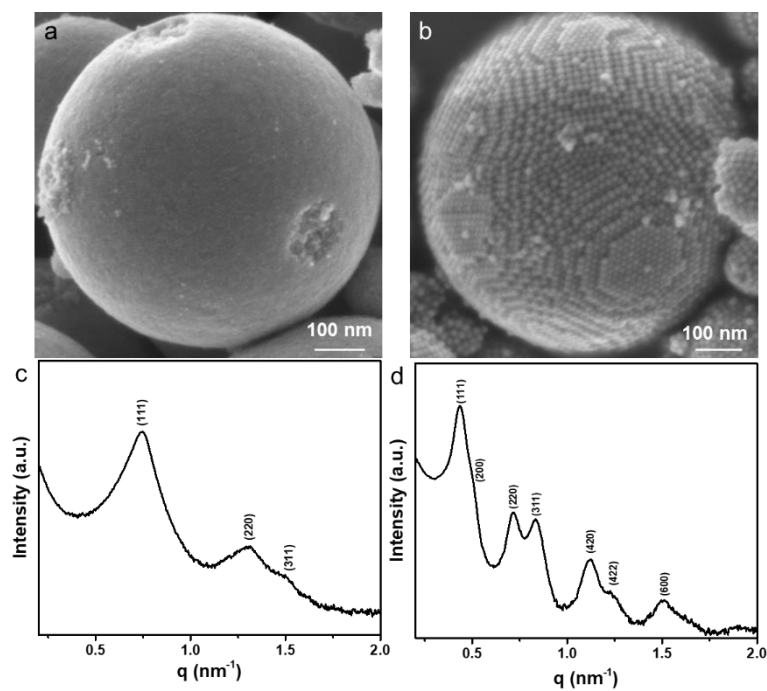

**Figure S11.** SEM images and the corresponding SAXS patterns of *fcc* superparticles composed of (a, c) 8.0 nm  $\text{CoFe}_2\text{O}_4$  NCs and (b, d) 17.0 nm  $\text{Fe}_3\text{O}_4$  NCs.

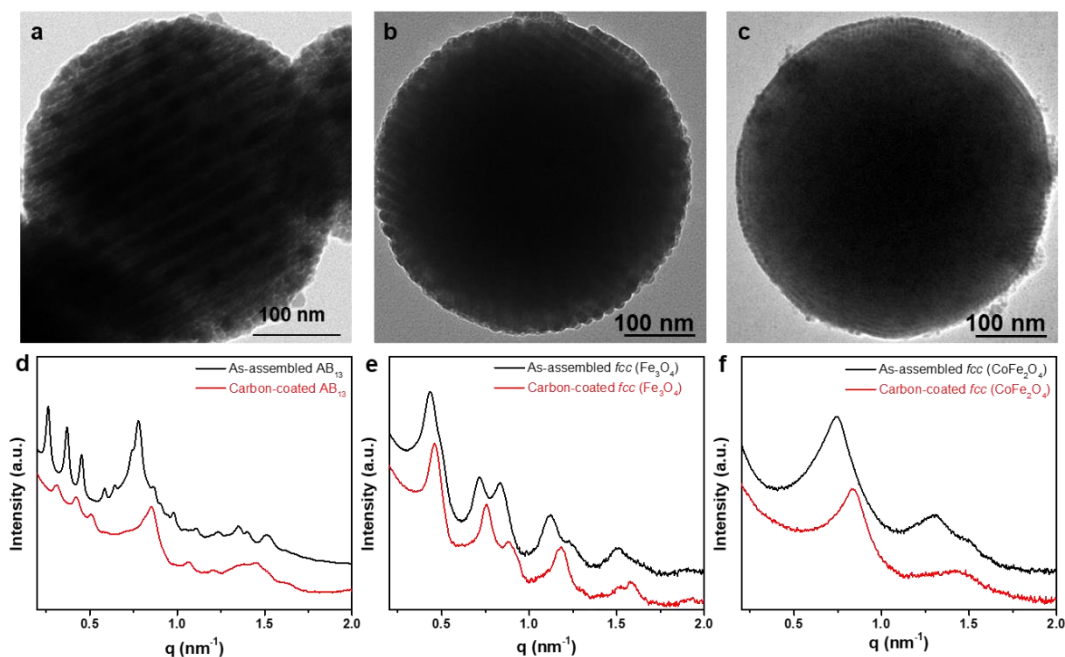

**Figure S12.** TEM images and the corresponding SAXS patterns of various superparticles after ligand carbonization: (a, d) carbon-coated  $AB_{13}$ -type binary superparticles composed of 8.0 nm  $CoFe_2O_4$  and 17.0 nm  $Fe_3O_4$  NCs; (b, e) carbon-coated *fcc* superparticles of 17.0 nm  $Fe_3O_4$  NCs; (c, f) carbon-coated *fcc* superparticles of 8.0 nm  $CoFe_2O_4$  NCs. For each type of superparticles, the SAXS patterns before ligand carbonization were also provided in (d-f) for comparison. For all sample, the peaks were systematically shifted toward high angles after ligand carbonization, suggesting the occurrence of lattice contract.

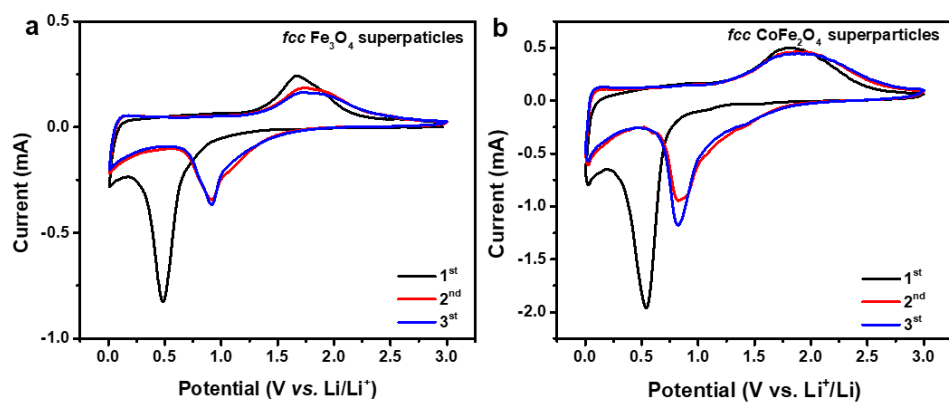

**Figure S13.** Representative CV curves of *fcc* superparticles composed of (a) 17.0 nm  $\text{Fe}_3\text{O}_4$  NCs and (b) 8.0 nm  $\text{CoFe}_2\text{O}_4$  NCs, respectively.

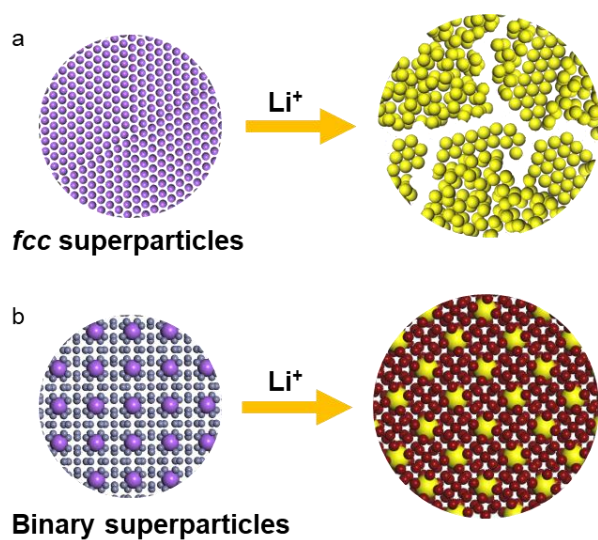

**Figure S14.** Cross-sectional illustration depicting the structural evolution of (a) *fcc* superparticles and (b) binary superparticles during electrochemical lithiation.



**Table S1.** Reaction conditions for growing monodisperse Fe<sub>3</sub>O<sub>4</sub> NCs with different sizes.

| NC size | Solvent               | Fe(OA) <sub>3</sub> | OA    | Temperature (°C) |
|---------|-----------------------|---------------------|-------|------------------|
| 20.0 nm | 50 g ODE              | 9.0 g               | 2.0 g | 325              |
| 17.0 nm | 50 g ODE              | 9.0 g               | 2.0 g | 320              |
| 15.0 nm | 50 g ODE              | 9.0 g               | 2.0 g | 318              |
| 11.0 nm | 10 g TDE/40 g ODE     | 9.0 g               | 2.0 g | 300              |
| 9.0 nm  | 17.5 g TDE/32.5 g ODE | 9.0 g               | 1.5 g | 290              |
| 8.5 nm  | 50 g HDE              | 9.0 g               | 2.0 g | 290              |
| 7.0 nm  | 50 g HDE              | 9.0 g               | 2.0 g | 288              |
| 6.5 nm  | 10 g TDE/40 g HDE     | 9.0 g               | 2.0 g | 280              |

**Table S2.** NC formulation for the growth of various BNSL colloids (The concentration of all NCs is 75 mg mL<sup>-1</sup> unless noted).

| Lattice structure | Volume of large NCs                            | Volume of small NCs                             |
|-------------------|------------------------------------------------|-------------------------------------------------|
| AB <sub>13</sub>  | 8.0 mL 17.0 nm Fe <sub>3</sub> O <sub>4</sub>  | 12.0 mL 8.0 nm CoFe <sub>2</sub> O <sub>4</sub> |
| AB <sub>13</sub>  | 8.0 mL 17.0 nm Fe <sub>3</sub> O <sub>4</sub>  | 12.0 mL 8.5 nm Fe <sub>3</sub> O <sub>4</sub>   |
| AB <sub>13</sub>  | 8.0 mL 20.0 nm Fe <sub>3</sub> O <sub>4</sub>  | 12.0 mL 9.0 nm CoFe <sub>2</sub> O <sub>4</sub> |
| AlB <sub>2</sub>  | 15.0 mL 11.0 nm Fe <sub>3</sub> O <sub>4</sub> | 5.0 mL 4.5 nm CoFe <sub>2</sub> O <sub>4</sub>  |
| AlB <sub>2</sub>  | 15.0 mL 15.0 nm Fe <sub>3</sub> O <sub>4</sub> | 5.0 mL 7.0 nm Fe <sub>3</sub> O <sub>4</sub>    |
| MgZn <sub>2</sub> | 12.0 mL 6.5 nm Fe <sub>3</sub> O <sub>4</sub>  | 8.0 mL 4.5 nm CoFe <sub>2</sub> O <sub>4</sub>  |
| MgZn <sub>2</sub> | 12.0 mL 9.0 nm Fe <sub>3</sub> O <sub>4</sub>  | 8.0 mL 6.5 nm Fe <sub>3</sub> O <sub>4</sub>    |
| NaCl              | 19.0 mL 15.0 nm Fe <sub>3</sub> O <sub>4</sub> | 1.0 mL 4.5 nm CoFe <sub>2</sub> O <sub>4</sub>  |
| CaCu <sub>5</sub> | 9.0 mL 7.0 nm Fe <sub>3</sub> O <sub>4</sub>   | 11.0 mL 4.5 nm CoFe <sub>2</sub> O <sub>4</sub> |
| AB <sub>13</sub>  | 0.2 mL 15.0 nm Fe <sub>3</sub> O <sub>4</sub>  | 0.8 mL 8.0 nm Pd (20 mg mL <sup>-1</sup> )      |
| AlB <sub>2</sub>  | 0.45 mL 15.0 nm Fe <sub>3</sub> O <sub>4</sub> | 0.55 mL 6.0 nm Pd (20 mg mL <sup>-1</sup> )     |
| AlB <sub>2</sub>  | 0.25 mL 15.0 nm Fe <sub>3</sub> O <sub>4</sub> | 0.75 mL 7.0 nm Au (20 mg mL <sup>-1</sup> )     |

**Table S3.** The leached Fe and Co contents in the electrolyte after cycling.

| Anodes                                                     | Fe<br>(ppm) | Fe mass loss<br>percentage (%) | Co<br>(ppm) | Co mass loss<br>percentage (%) |
|------------------------------------------------------------|-------------|--------------------------------|-------------|--------------------------------|
| AB <sub>13</sub> binary superparticles                     | 70          | 1.7                            | 4           | 0.3                            |
| <i>fcc</i> CoFe <sub>2</sub> O <sub>4</sub> superparticles | 172         | 4.8                            | 28          | 1.5                            |
| <i>fcc</i> Fe <sub>3</sub> O <sub>4</sub> superparticles   | 442         | 8.3                            | None        | None                           |

## Calculation of the packing fraction of carbon-coated AB<sub>13</sub>-type CoFe<sub>2</sub>O<sub>4</sub>-Fe<sub>3</sub>O<sub>4</sub> binary superparticles

### 1. Determination of the carbon shell thickness in fcc superparticles of 17.0 nm Fe<sub>3</sub>O<sub>4</sub>

NCs:

According to SAXS, the lattice constant ( $a$ ) of fcc superparticles of 17.0 nm Fe<sub>3</sub>O<sub>4</sub> NCs

is calculated to be  $a = \frac{2\pi\sqrt{h^2+k^2+l^2}}{q} = 24.6$  nm, where  $h$ ,  $k$ , and  $l$  are Miller's indices and  $q$

is the scattering vector.

The volume of a unit cell,  $Volume_{(\text{unit cell})}$ , is calculated as below:

$$Volume_{(\text{unit cell})} = a^3 = (24.6 \text{ nm})^3 = 14887 \text{ nm}^3.$$

Since the theoretical packing fraction of fcc superparticles is 74%, the carbon shell thickness ( $L1$ ) surrounding individual Fe<sub>3</sub>O<sub>4</sub> NCs is calculated to be 0.2 nm by the

equation  $\frac{Volume(\text{NC} + \text{carbon shell})}{Volume(\text{unit cell})} = \frac{4\pi}{3} \times \frac{4(8.5+L1)^3}{14887} = 74\%$ .

### 2. Determination of the carbon shell thickness in fcc superparticles of 8.0 nm CoFe<sub>2</sub>O<sub>4</sub>

NCs:

According to SAXS, the lattice constant ( $a$ ) of fcc superparticles of 8.0 nm CoFe<sub>2</sub>O<sub>4</sub>

NCs is calculated to be  $a = \frac{2\pi\sqrt{h^2+k^2+l^2}}{q} = 11.9$  nm.

The volume of a unit cell,  $Volume_{(\text{unit cell})}$ , is calculated as below:

$$Volume_{(\text{unit cell})} = a^3 = (11.9 \text{ nm})^3 = 1685 \text{ nm}^3.$$

Similar to fcc Fe<sub>3</sub>O<sub>4</sub> superparticles, the carbon shell thickness  $L2$  is calculated to be 0.2

nm by the equation  $\frac{Volume(\text{NCs} + \text{carbon shell})}{Volume(\text{unit cell})} = \frac{4\pi}{3} \times \frac{4(4.0+L2)^3}{1685} = 74\%$

### 3. Calculation of the packing fraction of carbon-coated AB<sub>13</sub> superparticles:

According to SAXS, the lattice constant ( $a$ ) of AB<sub>13</sub>-type CoFe<sub>2</sub>O<sub>4</sub>-Fe<sub>3</sub>O<sub>4</sub> binary

superparticles is calculated to be  $a = \frac{2\pi\sqrt{h^2+k^2+l^2}}{q} = 42.9$  nm.

The volume of a unit cell,  $Volume_{(\text{unit cell})}$ , is calculated as below:

$$Volume_{(\text{unit cell})} = a^3 = (42.9 \text{ nm})^3 = 78954 \text{ nm}^3.$$

Assuming that the carbon shells surrounding 17.0 nm  $\text{Fe}_3\text{O}_4$  NCs and 8.0 nm  $\text{CoFe}_2\text{O}_4$  NCs in binary superparticles are the same as  $L1$  and  $L2$  in thickness, the packing fraction of carbon-coated  $\text{AB}_{13}$  superparticles can be calculated as below:

$$packing\ fraction = \frac{Volume\ (\text{NCs} + \text{carbon shell})}{Volume\ (\text{unit cell})} = \frac{4\pi}{3} \times \frac{8(8.5+L1)^3 + 104(4.0+L2)^3}{78954} = 69\%.$$
